# Supplementary material for: The respiratory mechanics of the yacare caiman (Caiman yacareDaudine)
Source: Oxford University Press journal article supplement (doi:10.1242/jeb.193037), 2018-01-01
Supplement: jeb193037supp.pdf [file jeb193037supp.pdf]

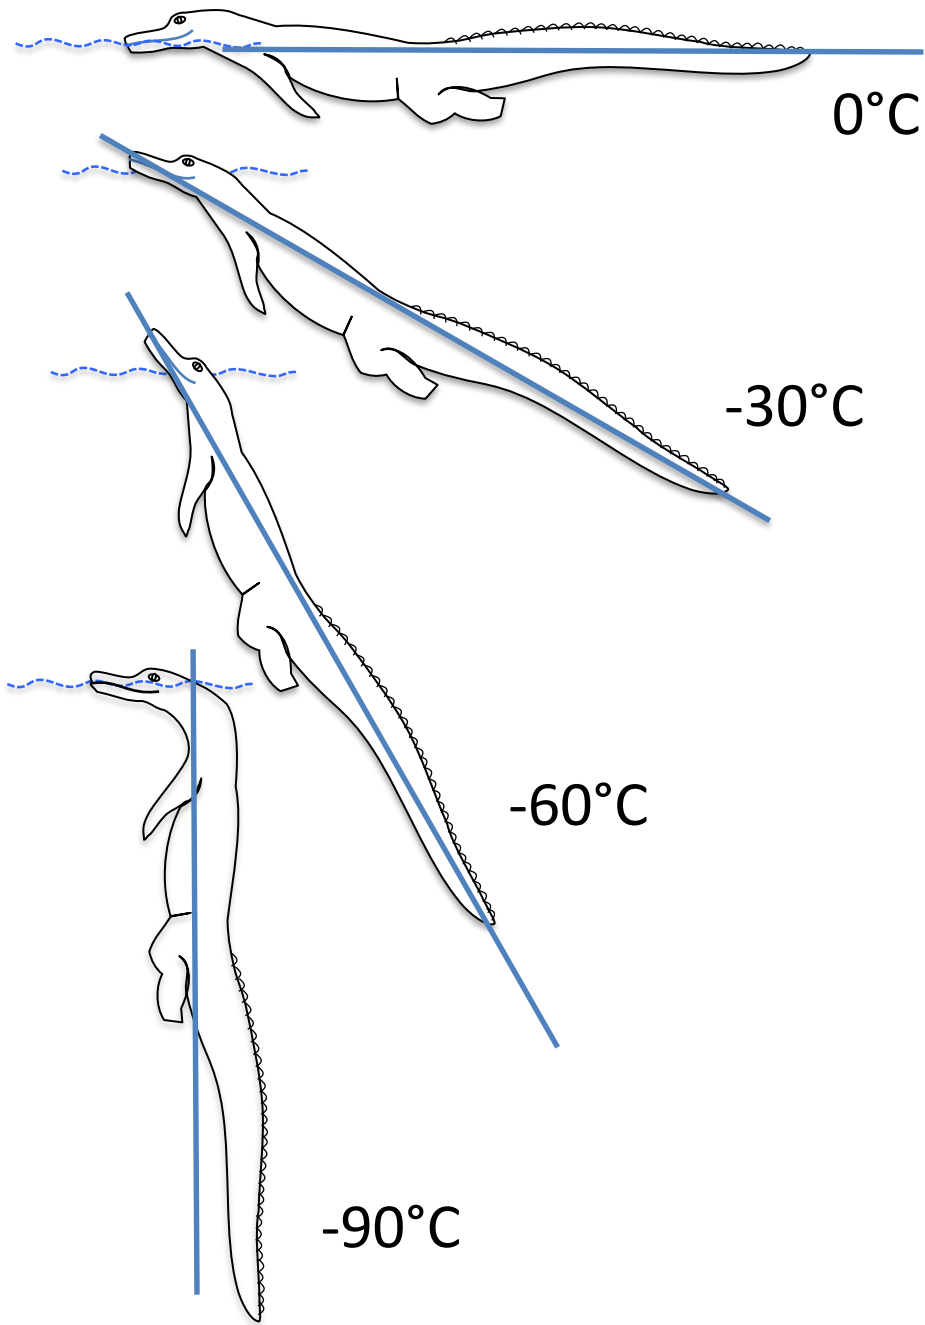

**Figure S1.** Schematic diagram illustrating the position of the juvenile caiman within the water column. Angles are in relation to the surface of the water.

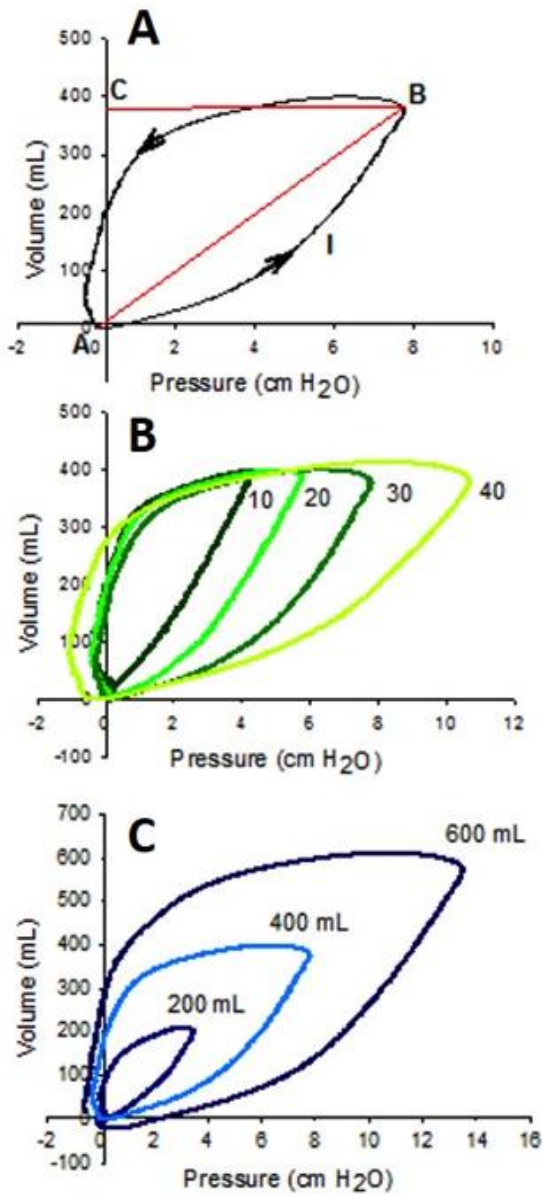

**Figure S2.** Schematic diagrams of the pressure-volume relationships during a ventilator cycle of an intact respiratory system. A illustrates the areas of the curve used for work calculations (see text for explanation). B and C illustrate the effect of increasing  $f_R$  and  $V_T$ , respectively, on intratracheal pressure.

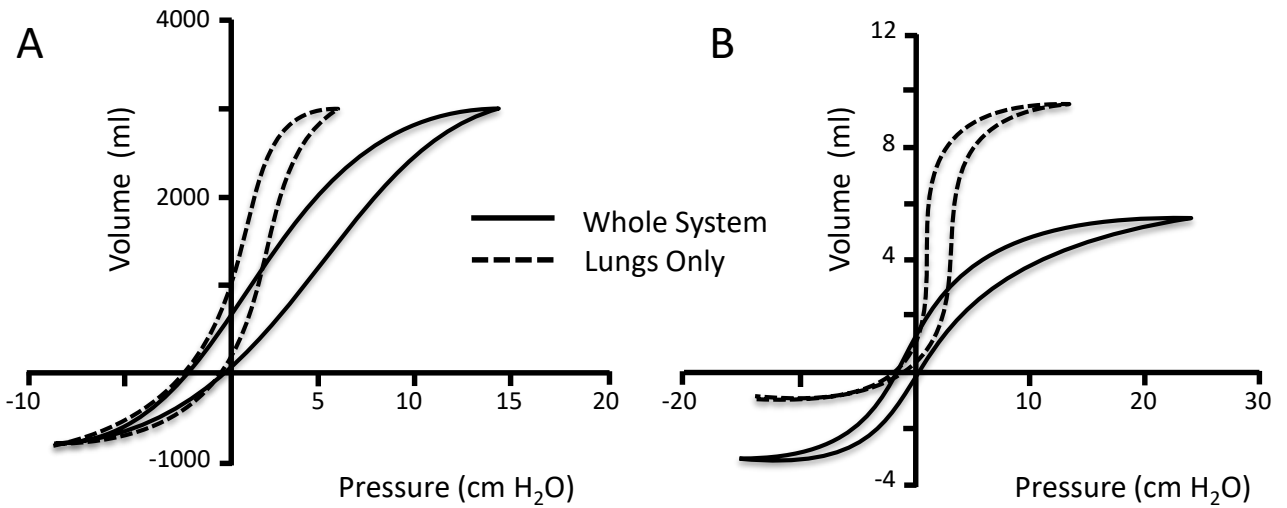

**Figure S3.** Static Pressure-volume curves of the intact system (solid lines) and the isolated lungs (broken lines) in adult (A) and juvenile (B) caiman.

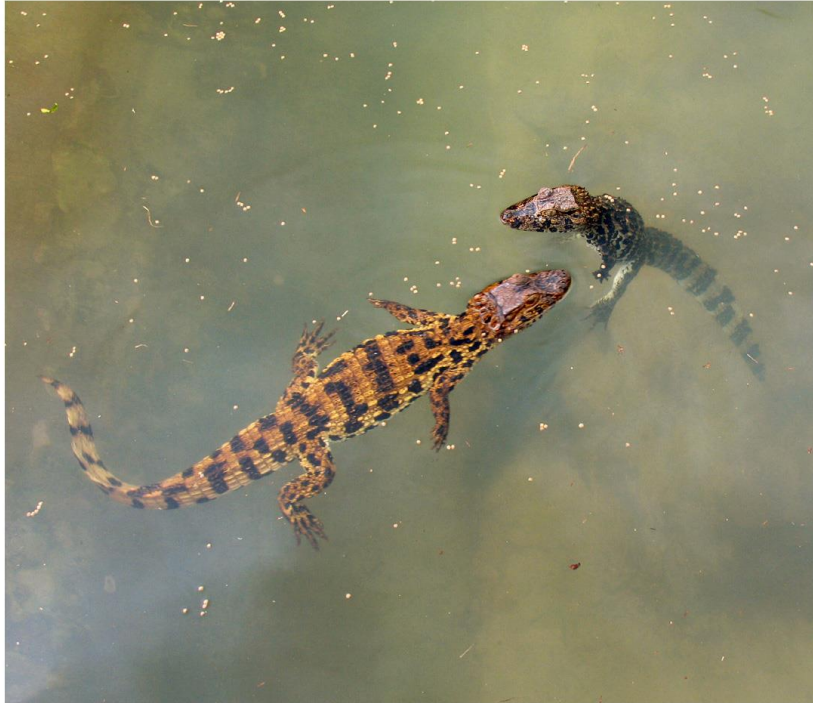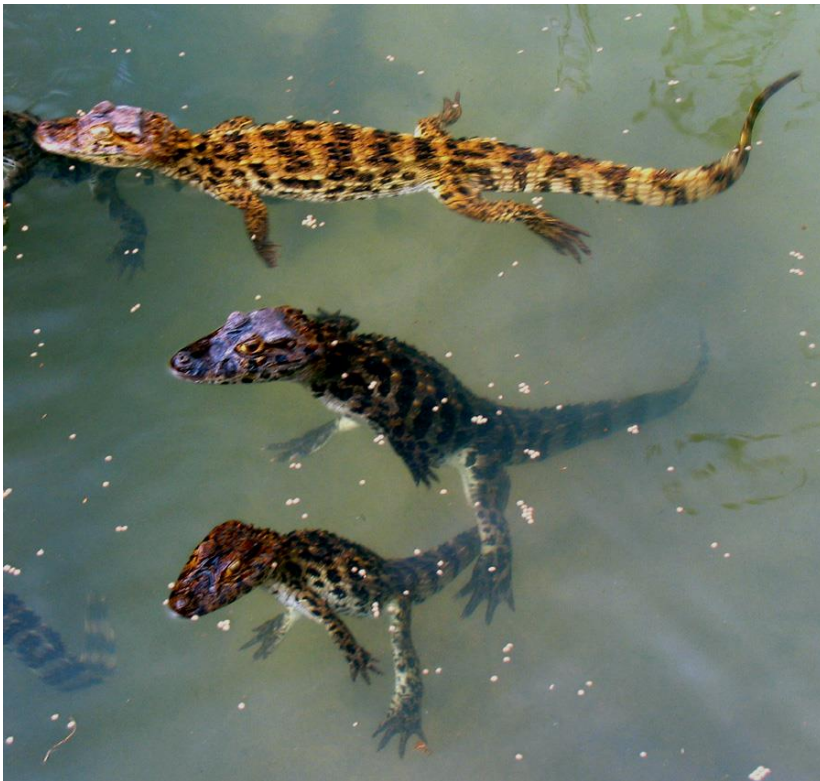

**Figure S4.** Photos of juvenile caiman floating with their bodies at different angles to the water surface.

|                         |                                   | Weight<br>kg | Temperature | VT<br>ml/kg | $f_R'$<br>/min |
|-------------------------|-----------------------------------|--------------|-------------|-------------|----------------|
| Munns et al, 2012       | <i>Crocodylus porosus</i>         | 0.98         | 30          | 16          | 11             |
| Munns et al 1998        | <i>Crocodylus porosus</i>         | 0.2 - 0.6    | 28-30       | 20          | 31             |
| Farmer and Carrier 2000 | <i>Alligator mississippiensis</i> | 1.34         | 30          | 22          | 7              |
| Naifeh et al., 1970     | <i>Caiman sclerops</i>            | 0.68         | 23-25       | 12.2        | 8              |
|                         | <i>Alligator mississippiensis</i> | 0.72         | 23-25       | 7.8         | 7              |
| Tattersall et al 2006   | <i>Caiman latirostris</i>         | 1.56         | 25          | 9.3         | 8              |
| Glass and Johansen 1979 | <i>Crocodylus niloticus</i>       | 5.0          | 25          | 11          | 10             |

**Table S1.** Tidal volume and instantaneous breathing frequencies of various crocodylian species taken from the literature



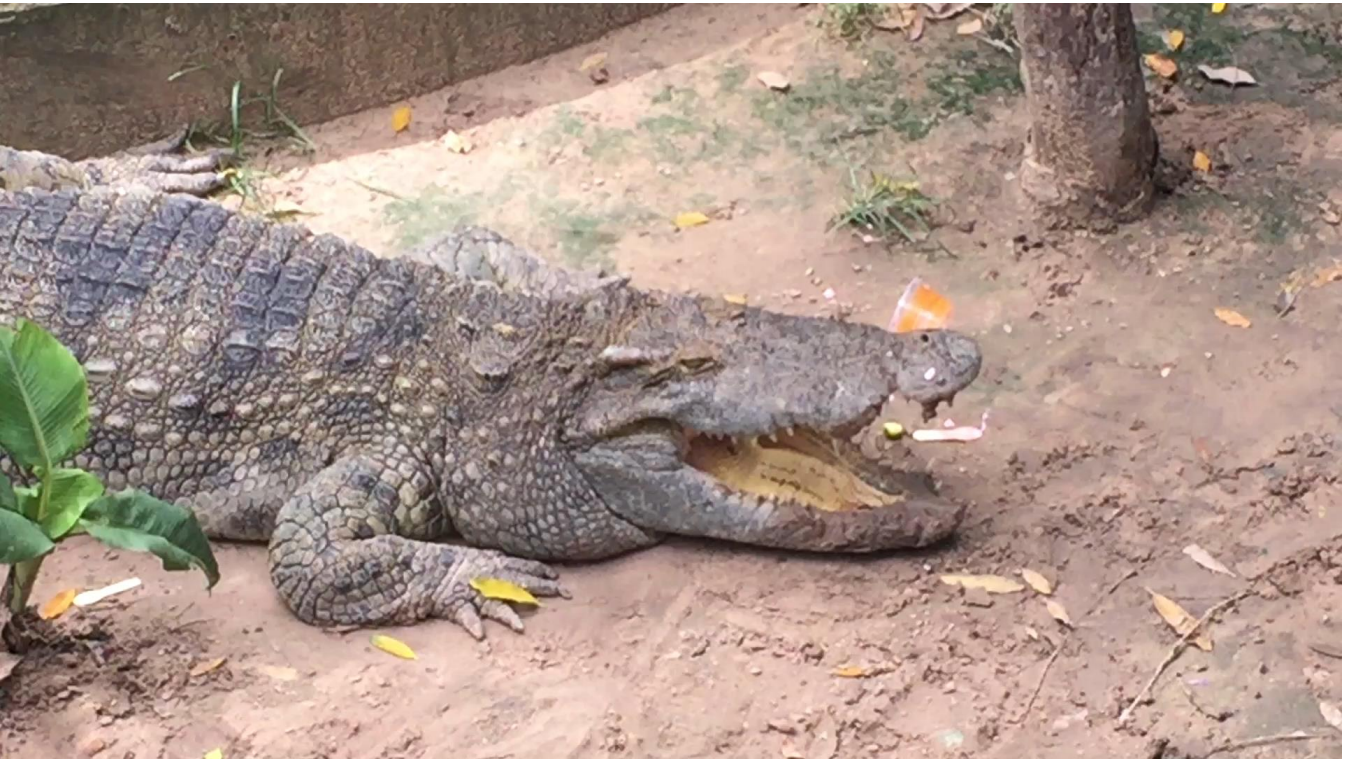

**Figure S5.** Thermal panting (gular flutter) in a crocodilian
